# Supplementary material for: Trio GEF mediates RhoA activation downstream of Slit2 and coordinates telencephalic wiring
Source: Oxford University Press journal article supplement (doi:10.1242/dev.153692), 2018-01-01
Supplement: dev153692supp.pdf [file dev153692supp.pdf]

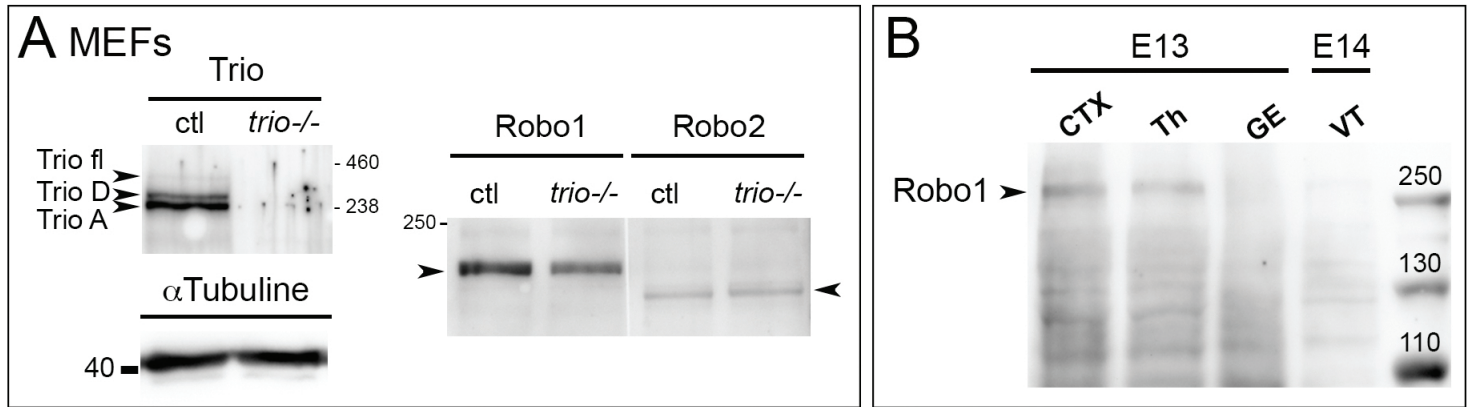

### Supplemental Figure 1 (Figure S1)

#### (A) Trio is absent in *trio*<sup>-/-</sup>, while Robo1/2 receptors are properly expressed.

Extracts from MEFs from either control or *trio*<sup>-/-</sup> mice have been used to visualize upon Western blot

the amount of remaining Trio, and the expression of Robo1/2. Both sources of MEFs expressed comparable levels of endogenously Robo1/2 receptors but MEFs isolated from the Trio KO did not express Trio anymore. The expression level of α-Tubulin, used as an internal control, remains unchanged.

#### (B) Robo1 is expressed in telencephalic and thalamic extracts.

Extracts from cortex (CTX), thalamus (Th) and ganglionic eminences (GE) at E13 and ventral telencephalon extract at E14 have been used to visualize Robo1 expression by Western blot. Its higher expression is visualized in E13 cortical and thalamic extract.
